# Supplementary material for: Hyperuricemia and Incident Cardiovascular Disease and Noncardiac Vascular Events in Patients with Rheumatoid Arthritis
Source: Int J Rheumatol. 2014 Aug 17;2014:523897. doi: 10.1155/2014/523897 (PMC4150464; doi:10.1155/2014/523897)
Supplement: Supplementary file 1 — The Supplementary Material consist of a table containing definitions used for non-cardiac vascular disease. [file 523897.f1.pdf]

Supplementary Table. Definitions used for non-cardiac vascular disease.

|                                                              |                                                                                                                                         |
|--------------------------------------------------------------|-----------------------------------------------------------------------------------------------------------------------------------------|
| 1. Hemorrhagic stroke                                        | Clinical diagnosis by neurologist + verified by CT/MRI or autopsy or cerebrospinal fluid analysis                                       |
| 2. Nonhemorrhagic or nonspecified stroke                     | Clinical diagnosis by neurologist + verified by CT/MRI or autopsy                                                                       |
| 3. Transient ischemic attack                                 | Clinical diagnosis by neurologist                                                                                                       |
| 4. Amaurosis fugax                                           | Clinical diagnosis                                                                                                                      |
| 5. Aortic aneurysm                                           | Diameter increased >50% compared with normal values; diameter $\geq 3.0$ cm in abdominal aorta; verified by ultrasound/CT or at autopsy |
| 6. Renal artery stenosis                                     | Verified by ultrasound/renal scintigraphy/angiography; assumed clinically significant if detected                                       |
| 7. Peripheral vascular disease or atherosclerosis obliterans | Clinical diagnosis supported by documented vascular physical examination; ankle/brachial index <0.9 or                                  |

---

|                                           |                                                                   |
|-------------------------------------------|-------------------------------------------------------------------|
|                                           | angiography confirming disease, if performed                      |
| 8. Arterial thromboembolism               | Clinical diagnosis supported by angiography or autopsy            |
| 9. Deep vein thrombosis                   | Verified by phlebography/venography or ultrasound or autopsy      |
| 10. Pulmonary embolism                    | Verified by angiography, CT angiography, scintigraphy, or autopsy |
| Cerebrovascular events (1-4 above)        |                                                                   |
| Peripheral arterial events (5-8 above)    |                                                                   |
| Venous thromboembolic events (9-10 above) |                                                                   |

---
